# Supplementary material for: Key Green Chemistry research areas from a pharmaceutical manufacturers’ perspective revisited
Source: Royal Society of Chemistry journal article supplement (doi:10.1039/c8gc01276h), 2018-01-01
Supplement: c8gc01276h1.pdf [file c8gc01276h1.pdf]

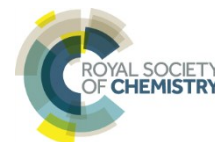

SUPPLEMENTARY INFORMATION

**Key Green Chemistry Research Areas from a Pharmaceutical Manufacturers' Perspective Revisited.**

Received 00th January 2018,  
Accepted 00th January 2018

DOI: 10.1039/x0xx00000x

[www.rsc.org/](http://www.rsc.org/)

Marian C. Bryan,<sup>a</sup> Peter J. Dunn,<sup>b</sup> David Entwistle,<sup>c</sup> Fabrice Gallou,<sup>d</sup> Stefan G. Koenig,<sup>e</sup> John D. Hayler,<sup>\*f</sup> Matthew R. Hickey,<sup>\*g</sup> Shaun Hughes,<sup>h</sup> Michael E. Kopach,<sup>i</sup> Gerard Moine,<sup>j</sup> Paul Richardson,<sup>k</sup> Frank Roschangar,<sup>l</sup> Alan Steven,<sup>h</sup> Franz J. Weiberth,<sup>m</sup>

**Roundtable Member Companies participating in the vote:**

Amgen,  
AstraZeneca  
Boehringer Ingelheim  
Bristol-Myers Squibb  
Codexis  
Dr. Reddy's  
Eli Lilly and Company  
F-Hoffmann-La Roche Ltd./Genentech  
GlaxoSmithKline  
Johnson & Johnson  
Merck & Co., Inc.  
Novartis  
Pfizer, Inc.  
Sanofi

Table 1: Long Lists and Votes

| Research Area                                                                                                                                                        | Votes |
|----------------------------------------------------------------------------------------------------------------------------------------------------------------------|-------|
| Development of effective and versatile methodology utilizing cheap/ sustainable metals (i.e. palladium replacement/ development of environmentally benign catalysts) | 11    |
| General methods for catalytic/sustainable (direct) amide or peptide formation                                                                                        | 10    |
| Aliphatic and aromatic C-H activation using green oxidants and giving predictable site selectivities                                                                 | 10    |
| Amide reductions avoiding LAH and diborane                                                                                                                           | 9     |
| Direct substitution of alcohols                                                                                                                                      | 8     |
| Catalyst immobilization without significant loss in kinetics                                                                                                         | 8     |
| Asymmetric hydrogenation of unfunctionalized olefins/enamines/imines                                                                                                 | 7     |
| Improved methods for Fluorination/Trifluoromethoxylation                                                                                                             | 6     |
| Wittig chemistry without $\text{Ph}_3\text{PO}$                                                                                                                      | 5     |
| Greener alternatives for oxidations and C-O or C-N redox processes                                                                                                   | 5     |
| Preparation of non-small molecule APIs e.g. Oligonucleotides, antibody/drug conjugates, proteins.                                                                    | 4     |
| Friedel-Crafts reactions on unactivated substrates                                                                                                                   | 4     |
| N-Centred chemistry avoiding azides, hydrazine etc.                                                                                                                  | 4     |
| Asymmetric hydroamination of olefins                                                                                                                                 | 4     |
| $\text{sp}^3\text{-sp}^2$ and $\text{sp}^3\text{-sp}^3$ carbon-carbon bond formations                                                                                | 4     |
| Tandem catalytic systems                                                                                                                                             | 4     |
| Asymmetric hydrocyanation                                                                                                                                            | 3     |
| Organocatalysis                                                                                                                                                      | 3     |
| Demethylation reactions                                                                                                                                              | 2     |
| Aldehyde or ketone + $\text{NH}_3$ + "X" to give a chiral amine                                                                                                      | 2     |
| Oxygen nucleophiles with high reactivity                                                                                                                             | 2     |
| Hydroxylation                                                                                                                                                        | 2     |
| Methods of coupling challenging heterocycles prone to protodeboronation                                                                                              | 2     |
| Synthesis of aliphatic /aromatic ethers                                                                                                                              | 1     |
| Green / scalable olefin metathesis (macrocyclization) at high concentration                                                                                          | 1     |
| Nitration reactions                                                                                                                                                  | 1     |
| Radical chemistry without $\text{Bu}_3\text{SnH}$                                                                                                                    | 1     |
| Asymmetric hydroformylation                                                                                                                                          | 1     |
| Direct arylation                                                                                                                                                     | 1     |
| Coupling of hindered amines with aryl halides                                                                                                                        | 1     |
| Better racemization catalysts for Dynamic Kinetic Resolutions                                                                                                        | 1     |
| Catalytic selective alkylation                                                                                                                                       | 1     |
| Sulfonation reactions                                                                                                                                                | 0     |
| Ester hydrolysis                                                                                                                                                     | 0     |
| Asymmetric hydrolysis of nitriles                                                                                                                                    | 0     |
| C-H halogenation                                                                                                                                                     | 0     |
| Photocatalysis for redox reactions                                                                                                                                   | 0     |
| Oxidation/Epoxidation methods without the use of chlorinated solvents                                                                                                | 0     |

  

| Solvent Themes                                                                   | Votes |
|----------------------------------------------------------------------------------|-------|
| Viable replacements for polar aprotic solvents                                   | 9     |
| Viable replacements for halogenated solvents                                     | 8     |
| Use of sustainable reaction media/solvents applicable to process scale chemistry | 6     |
| Improved chemistry methodology in aqueous systems                                | 4     |
| Viable replacements for ethereal solvents                                        | 0     |

Table 2: Hydrogen borrowing approaches to Piribedil

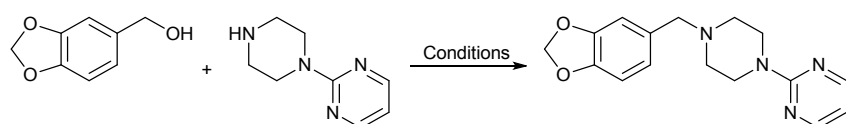

|   | Catalyst                                                                            | Solvent/base                                               | Temp/Pressure/Time        | Scale, Yield                                                                                      |
|---|-------------------------------------------------------------------------------------|------------------------------------------------------------|---------------------------|---------------------------------------------------------------------------------------------------|
| 1 | [Ru( <i>p</i> -cymene)Cl <sub>2</sub> ] <sub>2</sub> (1.25 mol %), dppe (2.5 mol %) | toluene                                                    | Reflux, 24 h              | 87%                                                                                               |
| 2 | [Ru( <i>p</i> -cymene)Cl <sub>2</sub> ] <sub>2</sub> (2.5 mol %), DPEphos (5 mol %) | neat                                                       | Microwave, 115 °C, 1.5 h  | Alcohol (2 mmol), 89% (chromatography)                                                            |
| 3 | Ir cat (0.005 mmol)                                                                 | TFE (2.6 mL), K <sub>2</sub> CO <sub>3</sub> (0.025 mmol), | 100 °C, 24 h              | Alcohol (0.5 mmol), amine (0.6 mmol), 99%                                                         |
| 4 | Fe Knölker complex (5 mol %) Homogeneous                                            | CPME Ne <sub>3</sub> NO (10 mol %)                         | 130 °C, 42 h              | Alcohol (4 equiv., 0.5 mmol), 54%                                                                 |
| 5 | Polystyrene supported Ru (0.29 mmol Ru/g) (5 mol %) Heterogeneous                   | toluene                                                    | 140 °C, sealed tube, 48 h | Alcohol (1.2 equiv.), amine (1 mmol), 98%                                                         |
| 6 | NiCuFeO <sub>x</sub> (50 mg), Ni 43.4, Cu 13.4, and Fe 12.1 wt %. Heterogeneous     | xylene                                                     | Reflux, sealed tube, 24 h | Alcohol (1.0 mmol), Amine (1.0 mmol), 93%                                                         |
| 7 | Au/TiO <sub>2</sub> 1 wt% (1.8 mol% Au) Heterogeneous                               | toluene                                                    | 200 °C, 50 bar            | Alcohol (1 g), piperazine (2 g), both (0.5M), 79% conversion, 77% yield after recryst, no column. |
| 8 | Palladacycle (0.5 mol %), P(2-furyl) <sub>3</sub> (1 mol %) Homogeneous             | Neat, LiOH, 4A sieves,                                     | 120 °C, 24 h              | Alcohol (1.2 equiv.), piperazine (assumed 3 mmol), 76% No experimental                            |
| 9 | Raney Nickel (0.5 g) Heterogeneous                                                  | xylene (10 – 12 mL)                                        | Reflux, 24 h              | Alcohol (4 equiv.), piperazine (4 mmol), 85% (chromatography)                                     |

1. M. Haniti S. A. Hamid, C. L. Allen, G. W. Lamb, A. C. Maxwell, H. C. Maytum, A. J. A. Watson and J. M. J. Williams, *J. Am. Chem. Soc.*, 2009, **131**, 1766.
2. A. J. A. Watson, A. C. Maxwell, and J. M. J. Williams, *J. Org. Chem.*, 2011, **76**, 2328.
3. Q. Zou, C. Wang, J. Smith, D. Xue and J. Xiao, *Chem. Eur. J.*, 2015, **21**, 9656.
4. T. Yan, B. L. Feringa and K. Barta, *Nature Commun.*, 2014, **5**, 5602.
5. S. P. Shan, T. T. Dang, A. M. Seayad and B. Ramalingam, *ChemCatChem.*, 2014, **6**, 808.
6. X. Cui, X. Dai, Y. Deng and F. Shi, *Chem. Eur. J.*, 2013, **19**, 3665.
7. N. Zotova, F. J. Roberts, G. H. Kelsall, A. S. Jessiman, K. Hellgardt and K. K. Hii, *Green Chem.*, 2012, **14**, 226.
8. R. Mamidala, V. Mukundam, K. Dhanunjayarao and K. Venkatasubbaiah, *Tetrahedron*, 2017, **73**, 2225.
9. A. Mehta, A. Thaker, V. Londhe and S. R. Nandan, *Appl. Catal., A*, 2014, **478**, 241.

Table 3: Nucleophilic deoxyfluorination reagents

| Name                                                                   | Structure                                                                                                               | Comments                                                                                                                                                                                                                                                                                                                                                                     |
|------------------------------------------------------------------------|-------------------------------------------------------------------------------------------------------------------------|------------------------------------------------------------------------------------------------------------------------------------------------------------------------------------------------------------------------------------------------------------------------------------------------------------------------------------------------------------------------------|
| X-Talfluor-E and -M <sup>1</sup>                                       | 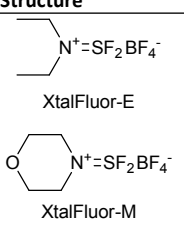 <p>XtalFluor-E</p> <p>XtalFluor-M</p> | SF <sub>2</sub> reagents with improved thermal stability over DAST. Deoxyfluorination, using triethylamine tris-HF (TREAT-HF) or DBU as additives in DCM or DCE.                                                                                                                                                                                                             |
| Fluolead <sup>2</sup>                                                  |                                        | SF <sub>3</sub> fluorinating agent with a higher temperature of thermal decomposition than DAST; doesn't react with water. Deoxyfluorination of secondary alcohols with inversion, ketones are converted to gem-difluorides with pyridine-HF additive and carboxylic acid to -CF <sub>3</sub> by heating neat at 100 °C. Alcohols and ketones reacted in DCM or DCE solvent. |
| Tetramethylfluoroformamidinium hexafluorophosphate (TFFH) <sup>3</sup> |                                        | C-F reagent for fluorination of allylic, benzylic and tertiary alcohols in ethyl acetate using TREAT-HF and triethylamine additives; elimination occurs predominantly with secondary alcohols.                                                                                                                                                                               |
| PhenoFluor <sup>4</sup>                                                |                                        | Imidazolium C-F reagent capable of direct substitution of phenols to aryl fluorides extended to deoxyfluorination of alcohols; moisture sensitive.                                                                                                                                                                                                                           |
| PyFluor <sup>5</sup>                                                   |                                        | Deoxyfluorination with low elimination by-products in toluene using only DBU as additive.                                                                                                                                                                                                                                                                                    |
| AlkylFluor <sup>6</sup>                                                |                                       | Moisture stable reagent for deoxyfluorination of primary and secondary alcohols, superior performance for sterically challenging alcohols. KF additive in dioxane, or convert to PhenoFluor <i>in situ</i> with CsF in toluene.                                                                                                                                              |

1. L'Heureux, F. Beaulieu, C. Bennett, D. R. Bill, S. Clayton, F. LaFlamme, M. Mirmehrabi, S. Tadayon, D. Tovell and M. Couturier, *J. Org. Chem.*, 2010, **75**, 3401.
2. T. Umemoto, R. P. Sigh, Y. Xu and N. Saito, *J. Am. Chem. Soc.* 2010, **132**, 18199.
3. G. Bellavance, P. Dube and B. Nguyen, *Synlett*, 2012, **23**, 569.
4. F. Sladojevich, S. I. Arlow, P. Tang and T. J. Ritter, *J. Am. Chem. Soc.*, 2013, **135**, 2470.
5. M. K. Nielson, C. R. Ugaz, W. Li and A. G. Doyle, *J. Am. Chem. Soc.*, 2015, **137**, 9571.
6. N. W. Goldberg, X. Shen, J. Li and T. Ritter, *Org. Lett.* 2016, **18**, 6102.

Table 4: Dipolar Aprotic Solvents Toxicity Data

|                           | DMF <sup>1</sup> | DMAC <sup>2</sup> | NBP <sup>3</sup> | N-Formylmorpholine <sup>4</sup> |
|---------------------------|------------------|-------------------|------------------|---------------------------------|
| CAS No.                   | [68-12-2]        | [127-19-5]        | [3470-98-2]      | [4394-85-8]                     |
| Rat Oral LD50             | 2200-7550 mg/kg  | 3000-6000 mg/kg   | 300-2000 mg/kg   | >7300 mg/kg                     |
| Rat Dermal LC50           | >3160 mg/kg      | 7500 mg/kg        | >2000 mg/kg      | >18400 mg/kg                    |
| Skin Irritation (Rabbits) | negative         | negative          | irritant         | negative                        |
| Eye Irritation (Rabbits)  | severe           | mild to moderate  | irritant         | negative                        |
| Reproductive toxicity     | positive         | positive          | negative         | not tested                      |

1. <http://webnet.oecd.org/hpv/UI/handler.axd?id=558b5269-b0ef-46a7-b240-b07c066ad62f>
2. <http://www.inchem.org/documents/sids/sids/127-19-5.pdf>
3. J. Sherwood, H. L. Parker, K. Moonen, T. J. Farmer and A. J. Hunt, *Green Chem.*, 2016, **18**, 3990.
4. [http://worldaccount.basf.com/wa/NAFTA~en\\_GB/Catalog/ChemicalsNAFTA/doc4/BASF/PRD/30036893/.pdf](http://worldaccount.basf.com/wa/NAFTA~en_GB/Catalog/ChemicalsNAFTA/doc4/BASF/PRD/30036893/.pdf)
